# Supplementary material for: Who ever said size doesn't matter? The association between journal title length and impact factor
Source: PubMed Central journal article supplement — NDT Plus. 2008 Jan 14;1(2):126–7. doi: 10.1093/ndtplus/sfm047 (PMC5477907; doi:10.1093/ndtplus/sfm047), 2008-01-14
Supplement: supp_sfm047_sfm047_supplementary_data.pdf [file supp_sfm047_sfm047_supplementary_data.pdf]

Supplementary Table

| Category                              | Number<br>of<br>journals | Median<br>impact<br>factor | Title length<br>high IF quintile* | Title length<br>low IF quintile* | p<br>value |
|---------------------------------------|--------------------------|----------------------------|-----------------------------------|----------------------------------|------------|
| Biochemistry & molecular<br>biology   | 261                      | 2.323                      | 26 (15-33)                        | 33 (25-39)                       | 0.015      |
| Cardiac & cardiovascular<br>systems   | 72                       | 1.559                      | 31.5 (21.5-44.25)                 | 28.5 (21.25-41)                  | 0.982      |
| Clinical neurology                    | 148                      | 1.620                      | 17.5 (10.75-<br>29.25)            | 26 (18.75-31)                    | 0.036      |
| Dentistry, oral surgery &<br>medicine | 49                       | 1.288                      | 27.5 (18.25-32.5)                 | 29 (22-36.5)                     | 0.472      |
| Endocrinology &<br>metabolism         | 89                       | 2.290                      | 30 (16-36.5)                      | 26.5 (18-41)                     | 0.950      |
| Gastroenterology &<br>hepatology      | 46                       | 1.804                      | 21 (9.5-25.5)                     | 32 (24-37.5)                     | 0.022      |
| Genetics & heredity                   | 124                      | 2.626                      | 19.5 (14.25-30.5)                 | 22.5 (15-29.25)                  | 0.680      |
| Hematology                            | 60                       | 2.008                      | 24 (10.25-36.75)                  | 34.5 (29.5-37.5)                 | 0.193      |
| Immunology                            | 115                      | 2.301                      | 22 (20-29)                        | 32 (25-40)                       | 0.019      |
| Infectious diseases                   | 43                       | 2.371                      | 28 (19.5-33.5)                    | 39 (27.5-51)                     | 0.052      |
| Medicine, general & internal          | 105                      | 0.971                      | 28 (23-37.5)                      | 23 (19.5-29.5)                   | 0.072      |
| Medicine, research &<br>experimental  | 72                       | 2.009                      | 24 (17.75-32.25)                  | 32 (19-45)                       | 0.118      |
| Microbiology                          | 86                       | 2.197                      | 27 (22-31.5)                      | 23 (15-35)                       | 0.480      |
| Multidisciplinary sciences            | 48                       | 0.445                      | 33 (16-79.5)                      | 39 (22.5-41.5)                   | 0.820      |

|                                                  |     |       |                   |                       |        |
|--------------------------------------------------|-----|-------|-------------------|-----------------------|--------|
| Neurosciences                                    | 200 | 2.362 | 23 (17-28)        | 27 (22-35.25)         | 0.010  |
| Nutrition & dietetics                            | 53  | 1.778 | 28 (20-38)        | 31 (18-46)            | 0.895  |
| Obstetrics & gynaecology                         | 57  | 1.468 | 25 (18-45)        | 39 (32-54)            | 0.070  |
| Oncology                                         | 123 | 2.371 | 24 (12.5-30)      | 26 (15-41.5)          | 0.485  |
| Ophthalmology                                    | 44  | 1.263 | 25 (20-34.5)      | 35 (27.5-49)          | 0.133  |
| Orthopaedics                                     | 41  | 1.018 | 29.5 (23-34.75)   | 24 (11.25-38)         | 0.636  |
| Pathology                                        | 66  | 1.624 | 32 (18.5-38.5)    | 22 (15.5-45.5)        | 0.608  |
| Paediatrics                                      | 73  | 1.102 | 40 (28-50)        | 29 (21-37)            | 0.049  |
| Peripheral vascular disease                      | 51  | 2.315 | 25 (11.75-39.25)  | 20 (10.75-34.25)      | 0.705  |
| Pharmacology & pharmacy                          | 193 | 1.889 | 27 (22-36)        | 30 (22-44)            | 0.150  |
| Physiology                                       | 75  | 2.145 | 30 (27-47)        | 37 (29-51)            | 0.506  |
| Psychiatry                                       | 94  | 2.045 | 23 (18-23)        | 29 (17-39)            | 0.530  |
| Public, environmental &<br>occupational health   | 99  | 1.526 | 28.5 (20-36)      | 32 (24.75-42)         | 0.198  |
| Radiology, nuclear medicine<br>& medical imaging | 84  | 1.562 | 27 (18.5-30)      | 28 (23-30.5)          | 0.468  |
| Surgery                                          | 139 | 1.017 | 27 (18-36)        | 32 (21-45)            | 0.100  |
| Urology & nephrology                             | 51  | 1.543 | 31.5 (17.5-45.25) | 17.5 (10.75-<br>24.5) | 0.045  |
| Overall                                          |     |       | 26 (18-34)        | 29 (20-39)            | <0.001 |

\* Presented as median (inter-quartile range). Differences between quintiles analysed using

Mann Whitney test.

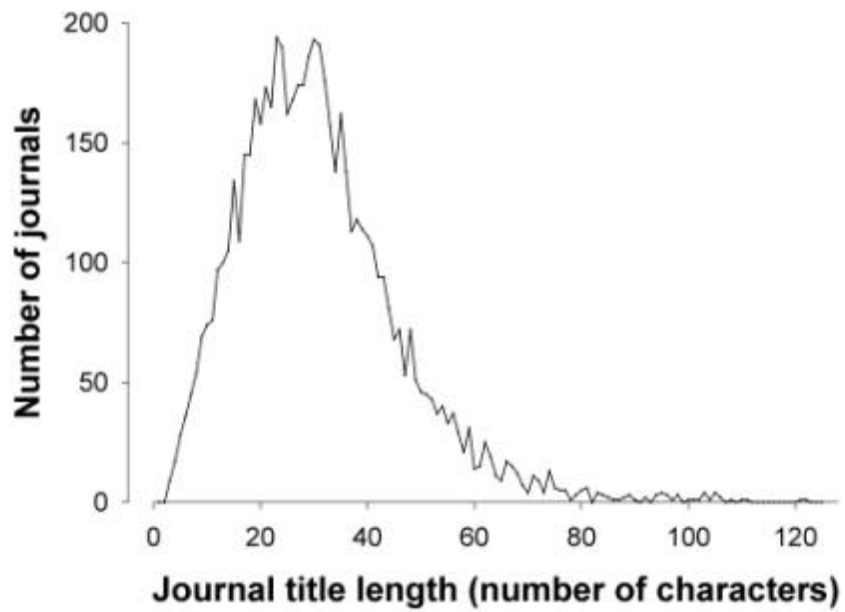

Legend to Supplementary Figure.

Plot of the number of journals per journal title length based on the *Journal Citation Reports Science edition 2005*.
